# Supplementary material for: Caffeine and Chlorogenic Acid Combination Attenuate Early-Stage Chemically Induced Colon Carcinogenesis in Mice: Involvement of oncomiR miR-21a-5p
Source: MDPI journal article supplement (doi:10.3390/ijms23116292), 2022-06-04
Supplement: s1 [file s1]

**Table S1.** Experimentally validated targets of mmu-miR-21a-5p.

| Target gene          | Database                      | Confidence                            |
|----------------------|-------------------------------|---------------------------------------|
| <i>FasI</i>          | miRTarbase, miRDB             | Reporter assay and Western blot       |
| <i>Peli1</i>         | miRTarbase, miRDB, TargetScan | qPCR and Western blot                 |
| <i>Pdcd4</i>         | miRTarbase, miRDB, TargetScan | Reporter assay, pPCR and Western blot |
| <i>Spry2</i>         | miRTarbase, miRDB, TargetScan | Reporter assay and Western blot       |
| <i>Pten</i>          | miRTarbase                    | Reporter assay, pPCR and Western blot |
| <i>Reck</i>          | miRTarbase, miRDB, TargetScan | Reporter assay, pPCR and Western blot |
| <i>Spry1</i>         | miRTarbase, miRDB, TargetScan | Reporter assay and Western blot       |
| <i>Tgfbi</i>         | miRTarbase, miRDB, TargetScan | Reporter assay, pPCR and Western blot |
| <i>Pdcd4</i>         | miRTarbase, miRDB, TargetScan | Others                                |
| <i>Btg2</i>          | miRTarbase, miRDB, TargetScan | Others                                |
| <i>Spry4</i>         | miRTarbase,                   | qPCR                                  |
| <i>Spry3</i>         | miRTarbase                    | Western blot                          |
| <i>Elavl4</i>        | miRTarbase                    | Others                                |
| <i>Pias3</i>         | miRTarbase                    | Western blot                          |
| <i>Tgfbr3</i>        | miRTarbase                    | Reporter assay, pPCR and Western blot |
| <i>Tnfrsf8</i>       | miRTarbase                    | Reporter assay, pPCR and Western blot |
| <i>Smad7</i>         | miRTarbase, miRDB, TargetScan | qPCR and Reporter assay               |
| <i>Gt(ROSA)26Sor</i> | miRTarbase                    | qPCR and Reporter assay               |
| <i>Yy1</i>           | miRTarbase                    | qPCR and Reporter assay               |
| <i>Eif4e3</i>        | miRTarbase                    | qPCR and Reporter assay               |
| <i>Pdcd10</i>        | miRTarbase                    | qPCR and Reporter assay               |
| <i>Timp3</i>         | miRTarbase, miRDB, TargetScan | qPCR                                  |
| <i>YOD1</i>          | miRTarbase, miRDB, TargetScan | Reporter assay, pPCR and Western blot |
| <i>PDCD4</i>         | miRTarbase, miRDB, TargetScan | qPCR and Western blot                 |
| <i>Mmp9</i>          | miRTarbase                    | qPCR and Western blot                 |
| <i>Kcnk6</i>         | miRTarbase                    | NGS                                   |
| <i>Map3k1</i>        | miRTarbase, miRDB, TargetScan | NGS                                   |
| <i>Cyfp1</i>         | miRTarbase                    | NGS                                   |
| <i>Rmnd5a</i>        | miRTarbase, miRDB, TargetScan | NGS                                   |
| <i>Tns1</i>          | miRTarbase, TargetScan        | NGS                                   |
| <i>Gid4</i>          | miRTarbase, miRDB, TargetScan | NGS                                   |
| <i>E2f2</i>          | miRTarbase                    | NGS                                   |
| <i>Rpp40</i>         | miRTarbase                    | NGS                                   |
| <i>Moap1</i>         | miRTarbase                    | NGS                                   |
| <i>AK010878</i>      | miRTarbase                    | NGS                                   |
